# Supplementary material for: Photostable ester-substituted bis-cyclometalated cationic iridium(iii) complexes for continuous monitoring of oxygen
Source: Royal Society of Chemistry journal article supplement (doi:10.1039/c5dt02804c), 2015-11-20
Supplement: c5dt02804c1.pdf [file c5dt02804c1.pdf]

# ESI for

## **Photostable ester-substituted bis-cyclometalated cationic iridium(III) complexes for continuous monitoring oxygen**

Chun Liu\*, Hongcui Yu, Yang Xing, Zhanming Gao and Zilin Jin

[\*] Dr. C. Liu, Corresponding Author

State Key Laboratory of Fine Chemicals, Dalian University of Technology, Linggong  
Road 2, Dalian 116024, China.

Tel.: +86-411-84986182.

E-mail: cliu@dlut.edu.cn

### **Content**

Synthetic method and characterization of ligands and iridium(III) complexes. *Page 2-4.*

**Fig. S1- S5.** Photoelectric properties of the iridium(III) complexes. *Page 5-6.*

**Fig. S6- S9.** Oxygen sensing properties of the iridium(III) complexes. *Page 7-9.*

**Fig. S10- S22.** NMR and HRMS of ligands and iridium(III) complexes. *Page 10-16.*

References *Page 17.*

## Synthetic method and characterization of ligands and iridium(III) complexes

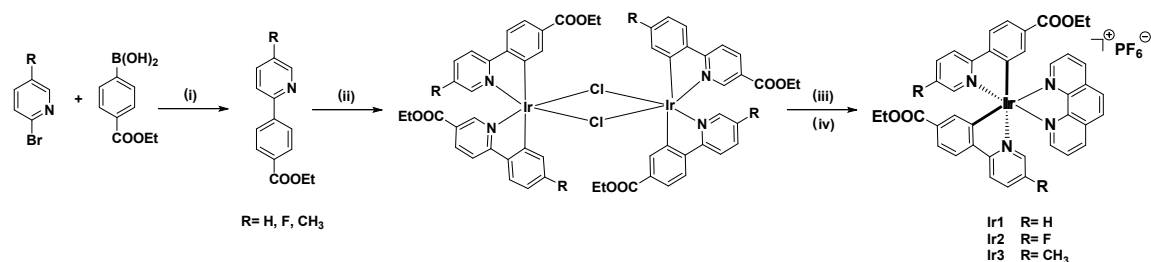

**Scheme S1** Synthetic routes of the cyclometalated iridium(III) complexes for this study.

(i) Pd(PPh<sub>3</sub>)<sub>4</sub>, Na<sub>2</sub>CO<sub>3</sub>, THF/H<sub>2</sub>O 3 : 1 (v/v), 80 °C, N<sub>2</sub>, 12h; (ii) IrCl<sub>3</sub>·3H<sub>2</sub>O, EtOCH<sub>2</sub>CH<sub>2</sub>OH/H<sub>2</sub>O 3 : 1 (v/v), 120 °C, N<sub>2</sub>, 24 h; (iii) 1,10-Phenanthroline, CH<sub>2</sub>Cl<sub>2</sub>/MeOH, 2 : 1 (v/v), 50°C, N<sub>2</sub>, 12h; (iv) KPF<sub>6</sub>, RT, 1 h.

Ligands and iridium(III) complexes were synthesized according to the literature methods for analogous compounds.<sup>1</sup> The whole synthesis route for iridium(III) complexes was shown in Scheme S1. For the sake of clarity and simplicity, the following abbreviations for the different C<sup>N</sup> ligand containing ester group are used throughout: **epbz1** for ethyl 4-(2-pyridinyl) benzoate, **epbz2** for ethyl 4-(5-fluoro-2-pyridinyl) benzoate, **epbz3** for ethyl 4-(5-methyl-2-pyridinyl) benzoate; **Ir1** for [Ir(**epbz1**)<sub>2</sub>(phen)]<sup>+</sup>PF<sub>6</sub><sup>-</sup>, **Ir2** for [Ir(**epbz2**)<sub>2</sub>(phen)]<sup>+</sup>PF<sub>6</sub><sup>-</sup>, and **Ir3** for [Ir(**epbz3**)<sub>2</sub>(phen)]<sup>+</sup>PF<sub>6</sub><sup>-</sup>.

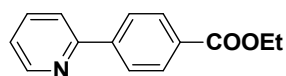

**epbz1**: yield: 87.7%; a white solid.

<sup>1</sup>H NMR (400 MHz, DMSO-*d*<sub>6</sub>): δ = 8.72 (d, *J* = 4.6 Hz, 1H), 8.24 (d, *J* = 8.5 Hz, 2H), 8.07 (d, *J* = 4.2 Hz, 3H), 7.93 (t, *J* = 8.6 Hz, 1H), 7.47 – 7.36 (m, 1H), 4.34 (q, *J* = 7.1 Hz, 2H), 1.34 (t, *J* = 7.1 Hz, 3H).

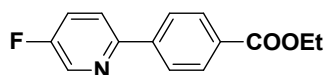

**epbz2**: yield: 86.9%; a white solid.

<sup>1</sup>H NMR (400 MHz, DMSO-*d*<sub>6</sub>): δ = 8.71 (d, *J* = 2.9 Hz, 1H), 8.19 (t, *J* = 8.7 Hz, 2H), 8.15 (dd, *J* = 8.9 Hz, 4.3 Hz, 1H), 8.06 (dd, *J* = 8.5 Hz, 2.0 Hz, 2H), 7.88 (td, *J* = 8.6 Hz, 2.7 Hz, 1H), 4.34 (q, *J* = 7.1 Hz, 2H), 1.34 (t, *J* = 7.1 Hz, 3H).

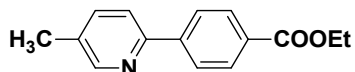

**epbz3**: yield: 78.3%; a white solid.

<sup>1</sup>H NMR (400 MHz, DMSO-*d*<sub>6</sub>): δ = 8.56 (s, 1H), 8.21 (d, *J* = 8.5 Hz, 2H), 8.05 (d, *J* = 8.4 Hz, 2H), 7.96 (d, *J* = 8.1 Hz, 1H), 7.75 (dd, *J* = 8.1 Hz, 1.6 Hz, 1H), 4.34 (q, *J* = 7.1 Hz, 2H), 2.36 (s, 3H), 1.35 (t, *J* = 7.1 Hz, 3H).

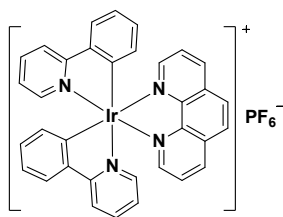

**Ir0:** Yield: 70.4%; a yellow solid.

$^1\text{H}$  NMR (400 MHz,  $\text{DMSO-}d_6$ ):  $\delta$  = 8.90 (d,  $J$  = 8.2 Hz, 2H), 8.39 (s, 2H), 8.23 (dd,  $J$  = 22.8 Hz, 6.5 Hz, 4H), 8.05 (dd,  $J$  = 8.2 Hz, 5.1 Hz, 2H), 7.95 (d,  $J$  = 7.7 Hz, 2H), 7.87 (t,  $J$  = 7.8 Hz, 2H), 7.46 (d,  $J$  = 5.7 Hz, 2H), 7.06 (t,  $J$  = 7.5 Hz, 2H), 7.02 – 6.91 (m, 4H), 6.29 (d,  $J$  = 7.5 Hz, 2H).

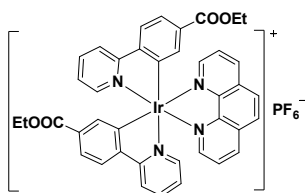

**Ir1:** Yield: 68.2%; a yellow solid.

$^1\text{H}$  NMR (400 MHz,  $\text{DMSO-}d_6$ ):  $\delta$  = 8.92 (d,  $J$  = 8.4 Hz, 2H), 8.41 (d,  $J$  = 7.0 Hz, 4H), 8.24 – 8.19 (m, 2H), 8.10 (d,  $J$  = 8.3 Hz, 2H), 8.06 – 7.95 (m, 4H), 7.67 – 7.52 (m, 4H), 7.13 (t,  $J$  = 6.6 Hz, 2H), 6.87 (d,  $J$  = 1.6 Hz, 2H), 4.14 (q,  $J$  = 7.0 Hz, 4H), 1.17 (t,  $J$  = 7.1 Hz, 6H).

$^{13}\text{C}$  NMR (100 MHz,  $\text{DMSO-}d_6$ ):  $\delta$  = 166.5, 166.4, 150.8, 149.5, 149.2, 148.2, 148.2, 146.7, 139.3, 138.5, 132.3, 131.8, 131.6, 128.9, 126.6, 124.7, 124.4, 120.8, 60.9, 14.2.  
HRMS ( $m/z$ ; EI): calcd. for  $\text{C}_{40}\text{H}_{32}\text{N}_4\text{O}_4\text{Ir} [\text{M} - \text{PF}_6]^+$  825.2053; found 825.2122.

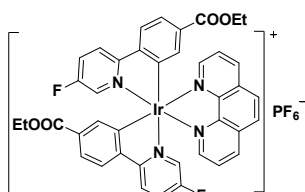

**Ir2:** Yield: 58.4%; a yellow-green solid.

$^1\text{H}$  NMR (400 MHz,  $\text{DMSO-}d_6$ ):  $\delta$  = 8.91 (dd,  $J$  = 8.3 Hz, 1.3 Hz, 2H), 8.52 (dd,  $J$  = 9.2 Hz, 5.4 Hz, 2H), 8.39 (s, 2H), 8.17 (dd,  $J$  = 5.1 Hz, 1.2 Hz, 2H), 8.11 (dd,  $J$  = 11.3 Hz, 5.5 Hz, 4H), 8.01 (dd,  $J$  = 8.3 Hz, 5.1 Hz, 2H), 7.68 – 7.58 (m, 4H), 6.85 (d,  $J$  = 1.6 Hz, 2H), 4.16 (q,  $J$  = 7.1 Hz, 4H), 1.19 (t,  $J$  = 7.1 Hz, 6H).

$^{13}\text{C}$  NMR (100 MHz,  $\text{DMSO-}d_6$ )  $\delta$  = 165.4, 162.8, 159.3, 157.3, 151.2, 147.8, 146.3, 139.1, 138.6, 138.3, 131.4, 130.3, 128.3, 127.2, 127.0, 125.1, 123.7, 122.7, 60.4, 14.2.  
HRMS ( $m/z$ ; EI): calcd. for  $\text{C}_{40}\text{H}_{30}\text{F}_2\text{N}_4\text{O}_4\text{Ir} [\text{M} - \text{PF}_6]^+$  861.1864; found 861.1914.

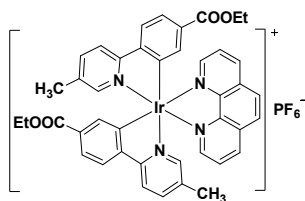

**Ir3:** Yield 61.3%; a yellow solid.

$^1\text{H}$  NMR (400 MHz,  $\text{DMSO-}d_6$ ):  $\delta$  = 8.91 (dd,  $J$  = 8.3 Hz, 1.2 Hz, 2H), 8.40 (s, 2H), 8.31 (d,  $J$  = 8.5 Hz, 2H), 8.20 (dd,  $J$  = 5.1 Hz, 1.3 Hz, 2H), 8.04 (dd,  $J$  = 8.3 Hz, 4.4 Hz, 4H), 7.86 (d,  $J$  = 9.5 Hz, 2H), 7.61 (dd,  $J$  = 8.1 Hz, 1.6 Hz, 2H), 7.30 (s, 2H), 6.85 (d,  $J$  = 1.6 Hz, 2H), 4.13 (q,  $J$  = 7.1 Hz, 4H), 2.01 (s, 6H), 1.18 (t,  $J$  = 7.1 Hz, 6H).

$^{13}\text{C}$  NMR (100 MHz,  $\text{DMSO-}d_6$ ):  $\delta$  = 166.0, 163.5, 151.4, 149.6, 149.3, 148.8, 146.6, 140.3, 139.4, 135.6, 131.9, 131.6, 130.4, 128.8, 127.7, 125.0, 124.0, 121.4, 60.9, 18.0, 14.4.

HRMS ( $m/z$ ; EI): calcd. for  $\text{C}_{42}\text{H}_{36}\text{N}_4\text{O}_4\text{Ir} [\text{M} - \text{PF}_6]^+$  853.2366; found 853.2413.

**Table S1.** Crystallographic data for **Ir2**.

|                                      |                                                                      |
|--------------------------------------|----------------------------------------------------------------------|
| Empirical formula                    | $\text{C}_{48}\text{H}_{50}\text{F}_8\text{IrN}_4\text{O}_5\text{P}$ |
| Formula weight                       | 1138.09                                                              |
| Crystal temperature (K)              | 296(2)                                                               |
| Crystal system                       | Monoclinic                                                           |
| Space group                          | $\text{P}2/n$                                                        |
| Z                                    | 2                                                                    |
| a(Å)                                 | 15.1089(4)                                                           |
| b(Å)                                 | 11.0424(3)                                                           |
| c(Å)                                 | 15.6517(4)                                                           |
| $\alpha$ (deg)                       | 90.00                                                                |
| $\beta$ (deg)                        | 110.4110(10)                                                         |
| $\gamma$ (deg)                       | 90.00                                                                |
| V(Å <sup>3</sup> )                   | 2447.35(11)                                                          |
| $D_x$ (Mg.cm <sup>-3</sup> )         | 1.544                                                                |
| $\mu$ (mm <sup>-1</sup> )            | 1.285                                                                |
| F(000)                               | 1140.0                                                               |
| $R_{\text{int}}$                     | 0.0225                                                               |
| No. of collected data(unique)        | 4292                                                                 |
| No. of parameters varied             | 371                                                                  |
| s                                    | 1.039                                                                |
| final R indices [ $I > 2\sigma(I)$ ] | 0.0334                                                               |

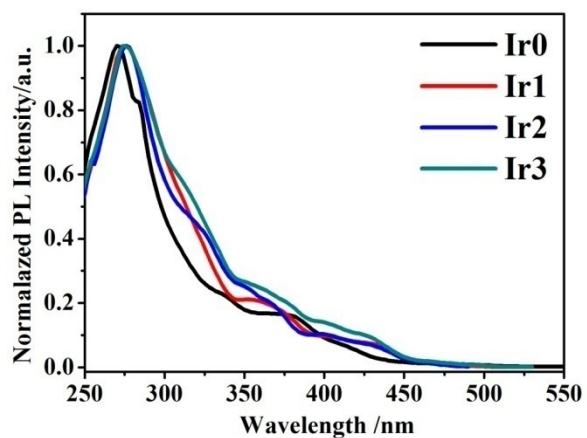

Fig. S1. Photoluminescence excitation spectra of Ir0~Ir3 in CH<sub>2</sub>Cl<sub>2</sub>.

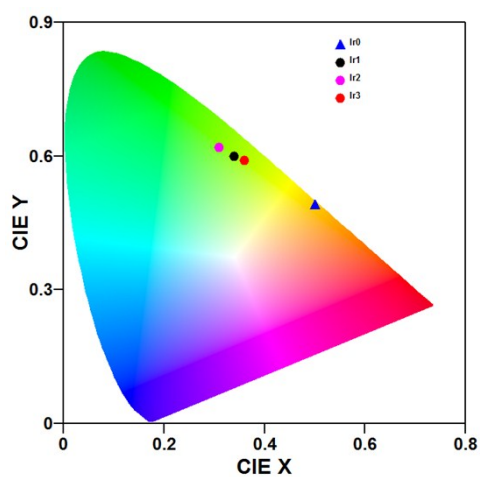

Fig. S2. CIE Plots for Ir0 (0.50, 0.49), Ir1 (0.34, 0.60), Ir2 (0.31, 0.62), and Ir3 (0.36, 0.59).

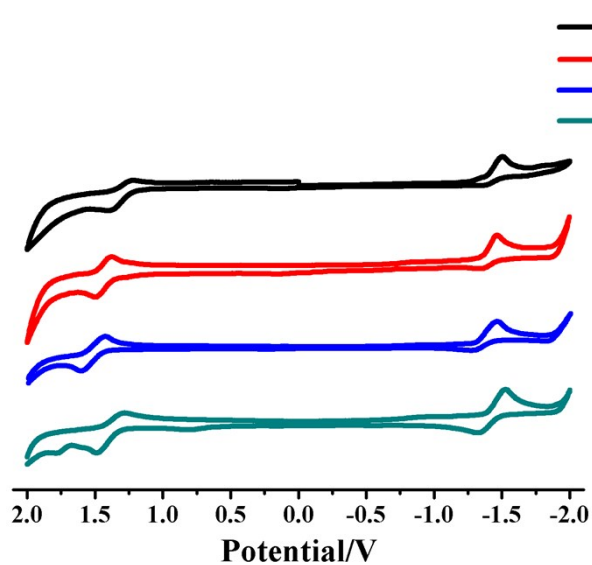

Fig. S3. Cyclic voltamograms for complexes Ir0~Ir3.

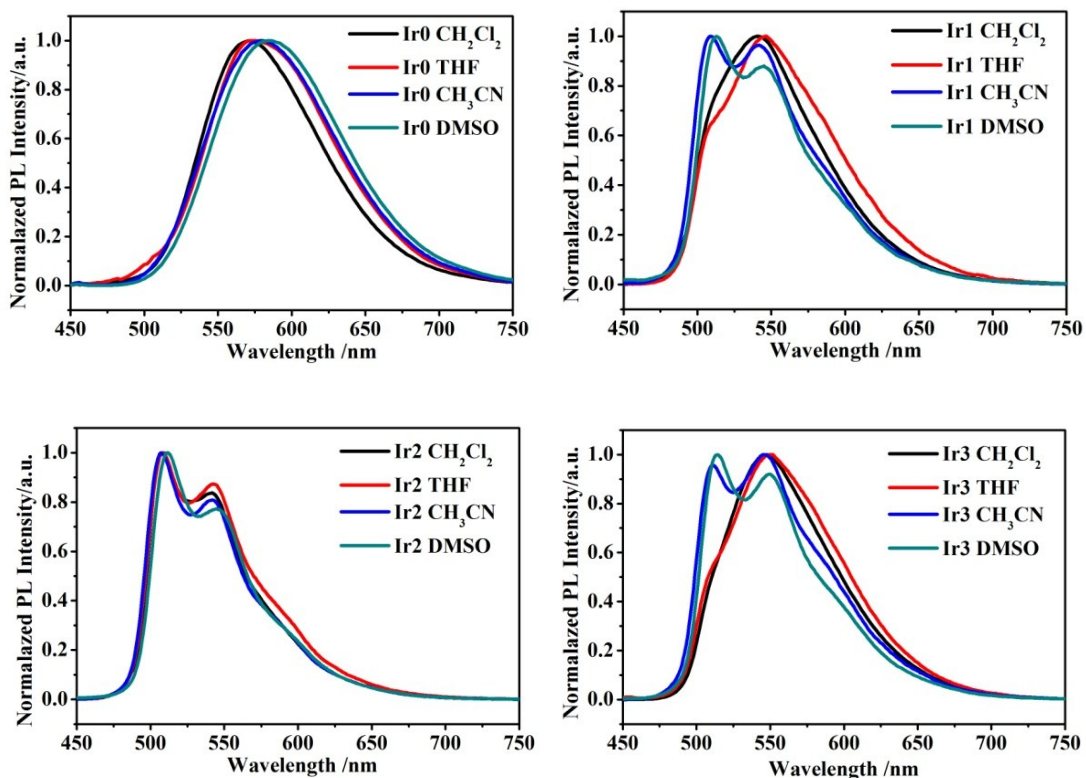

Fig. S4. Emission spectra of the Ir0~Ir3 ( $\lambda_{\text{ex}} = 400$  nm) in different solvents, at ambient temperature.

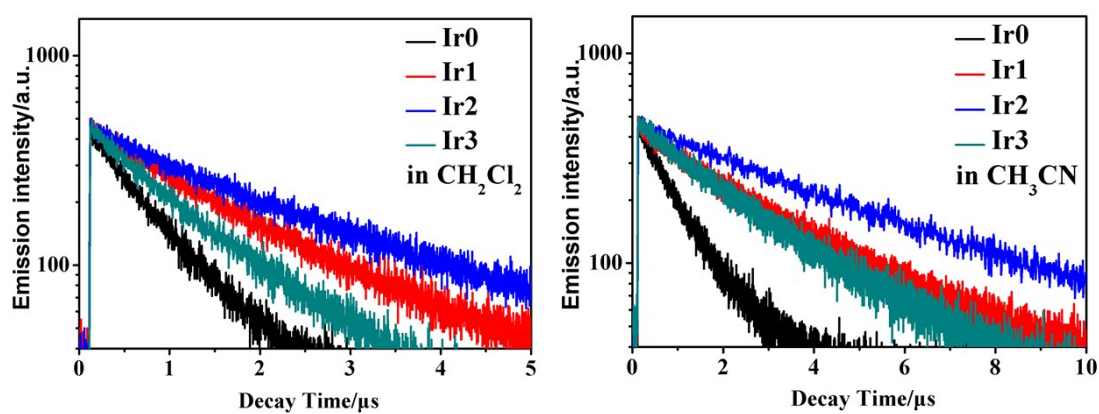

Fig. S5. Phosphorescence decay profiles of complexes Ir0~Ir3 in degassed CH<sub>2</sub>Cl<sub>2</sub> and degassed CH<sub>3</sub>CN, at ambient temperature.

**Table S2.** Radiative rate constant and nonradiative rate constant of the Ir(III) complexes<sup>a</sup>.

| Ir complexes | $k_r(\text{s}^{-1}) \times 10^5$ | $k_{nr}(\text{s}^{-1}) \times 10^5$ |
|--------------|----------------------------------|-------------------------------------|
| Ir0          | 2.87                             | 9.63                                |
| Ir1          | 1.09                             | 3.86                                |
| Ir2          | 1.23                             | 2.01                                |
| Ir3          | 2.15                             | 5.25                                |

<sup>a</sup> Calculated from  $k_r = \Phi_p \times \tau^{-1}$ ,  $k_{nr} = \tau^{-1} - k_r$  in degassed  $\text{CH}_2\text{Cl}_2$  solution.

**Table S3.** Parameters for the  $\text{O}_2$ -sensing film of the Ir1 with different polymers as the supporting matrix (fitting of the result to the two-site model).

| Ir1 complex<br>(0.5 wt%) | $f_1^a$ | $f_2^a$ | $K_{SV1}^b$ | $K_{SV2}^b$ | $r^2^c$ | $K_{SV}^{app}^d$ | $P_{O_2}^e$ |
|--------------------------|---------|---------|-------------|-------------|---------|------------------|-------------|
| Ir1 (EC)                 | 0.9625  | 0.0375  | 0.01003     | 0.0000      | 0.98891 | 0.00965          | 103.63      |
| Ir1 (PCHC)               | 0.9515  | 0.0485  | 0.00090     | 0.0001      | 0.96966 | 0.00086          | 1162.79     |
| Ir1 (PS)                 | 0.9837  | 0.0163  | 0.00205     | 0.0000      | 0.97691 | 0.00202          | 495.05      |

<sup>a</sup> Ratio of the two portions of the iridium(III) complexes. <sup>b</sup> Quenching constant of the two portions. <sup>c</sup> Determination coefficients. <sup>d</sup> Weighted quenching constant,  $K_{SV}^{app} = f_1 K_{SV1} + f_2 K_{SV2}$ . <sup>e</sup> The oxygen partial pressure at which the initial emission intensity of the film is quenched by 50% and calculated as  $1/K_{SV}^{app}$ , in Torr.

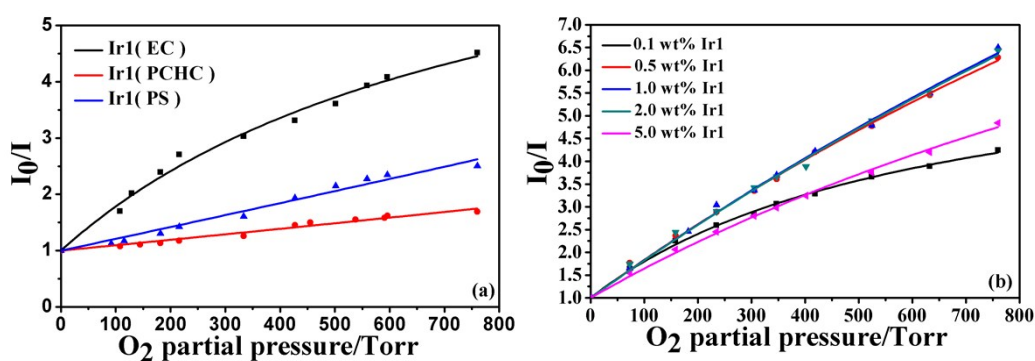**Fig. S6.** (a) Stern-Volmer plots (intensity ratios  $I_0/I$  versus  $\text{O}_2$  partial pressure) of Ir1 (0.5 wt%) immobilized into different oxygen sensing films; (b) Stern-Volmer plots of the different content of Ir1 in EC film, at ambient temperature.

**Table S4.** Parameters for the O<sub>2</sub>-sensing film of the different content iridium(III) complexes with EC as the supporting matrix (fitting of the result to the two-site model).

| Ir1 complex<br>( wt% ) | $f_1^a$ | $f_2^a$ | $K_{SV1}^b$ | $K_{SV2}^b$ | $r^2^c$ | $K_{SV}^{app}^d$ | $P_{O_2}^e$ |
|------------------------|---------|---------|-------------|-------------|---------|------------------|-------------|
| 0.1 wt% Ir1            | 0.85387 | 0.14613 | 0.01083     | 0.0001      | 0.99772 | 0.00625          | 160.00      |
| 0.5 wt% Ir1            | 0.96251 | 0.03749 | 0.00895     | 0.0000      | 0.99790 | 0.00861          | 116.14      |
| 1.0 wt% Ir1            | 0.97035 | 0.02965 | 0.00873     | 0.0001      | 0.99692 | 0.00847          | 118.06      |
| 2.0 wt% Ir1            | 0.96942 | 0.03058 | 0.00871     | 0.0001      | 0.99603 | 0.00844          | 118.48      |
| 5.0 wt% Ir1            | 0.93360 | 0.06640 | 0.00721     | 0.0001      | 0.99738 | 0.00674          | 148.37      |

<sup>a</sup> Ratio of the two portions of the iridium(III) complex Ir1. <sup>b</sup> Quenching constant of the two portions. <sup>c</sup> Determination coefficients. <sup>d</sup> Weighted quenching constant,  $K_{SV}^{app} = f_1 K_{SV1} + f_2 K_{SV2}$ . <sup>e</sup> The oxygen partial pressure at which the initial emission intensity of the film is quenched by 50% and calculated as  $1/K_{SV}^{app}$ , in Torr.

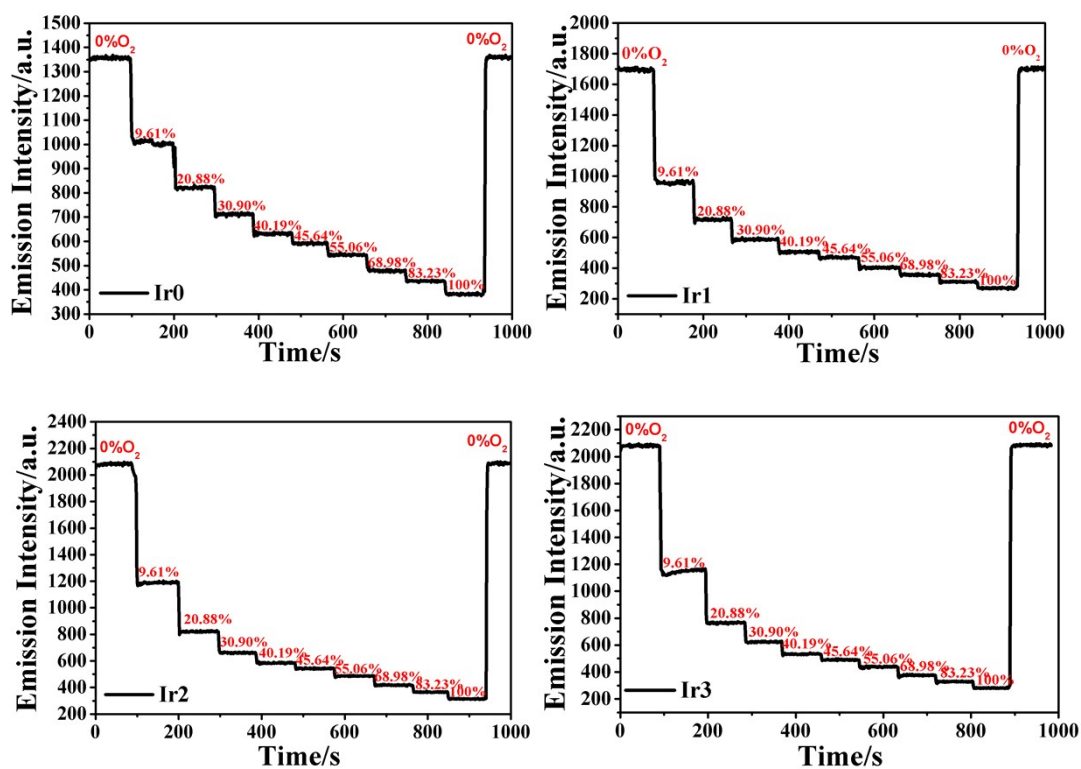

**Fig. S7.** Variation of the emission intensity of Ir0~Ir3 incorporated into EC with the oxygen concentration.



**Table S5.** Lifetime Data for Ir0~Ir3 <sup>a</sup>.

| Ir complexes | $\tau$ (ns)       |                      |                      |                      |                      |                      |
|--------------|-------------------|----------------------|----------------------|----------------------|----------------------|----------------------|
|              | 0% O <sub>2</sub> | 2.17% O <sub>2</sub> | 3.38% O <sub>2</sub> | 5.11% O <sub>2</sub> | 7.06% O <sub>2</sub> | 9.61% O <sub>2</sub> |
| <b>Ir0</b>   | 1130.12           | 317.79               | 235.91               | 179.42               | 140.85               | 106.39               |
| <b>Ir1</b>   | 3812.01           | 1108.53              | 729.75               | 504.58               | 352.34               | 296.32               |
| <b>Ir2</b>   | 4569.79           | 1466.12              | 1105.58              | 761.36               | 530.53               | 419.06               |
| <b>Ir3</b>   | 3210.56           | 758.77               | 545.03               | 381.45               | 271.97               | 206.91               |

<sup>a</sup> The lifetime ( $\tau$ ) in CH<sub>3</sub>CN solution ( $1.0 \times 10^{-5}$  M) on the different concentration of oxygen (0-9.61%) was measured at ambient temperature.

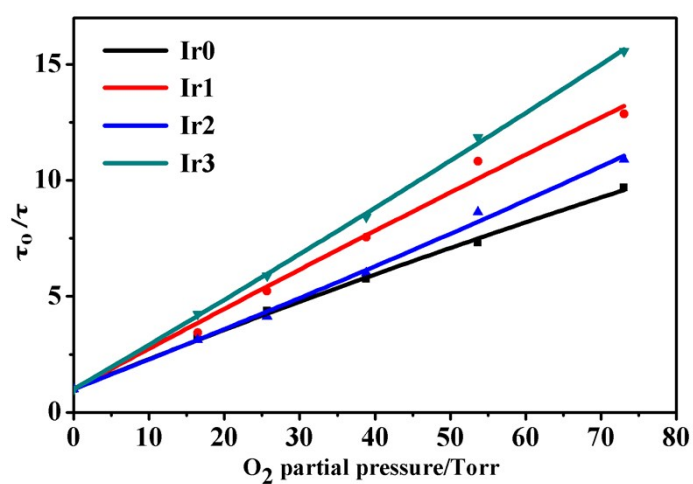

**Fig. S8.** Stern–Volmer plots (intensity ratios  $\tau_0/\tau$  versus O<sub>2</sub> partial pressure (0-9.61%)) of Ir0~Ir3 in CH<sub>3</sub>CN solutions ( $1.0 \times 10^{-5}$  M)

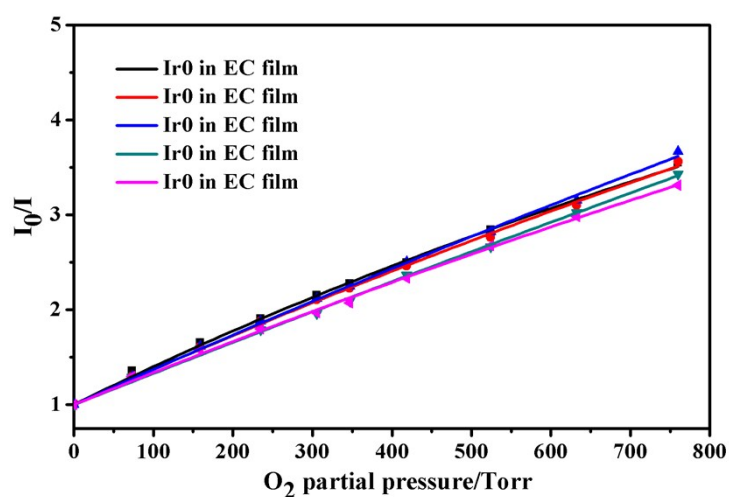

**Fig. S9.** The reproducibility tests of oxygen sensing films of Ir0.

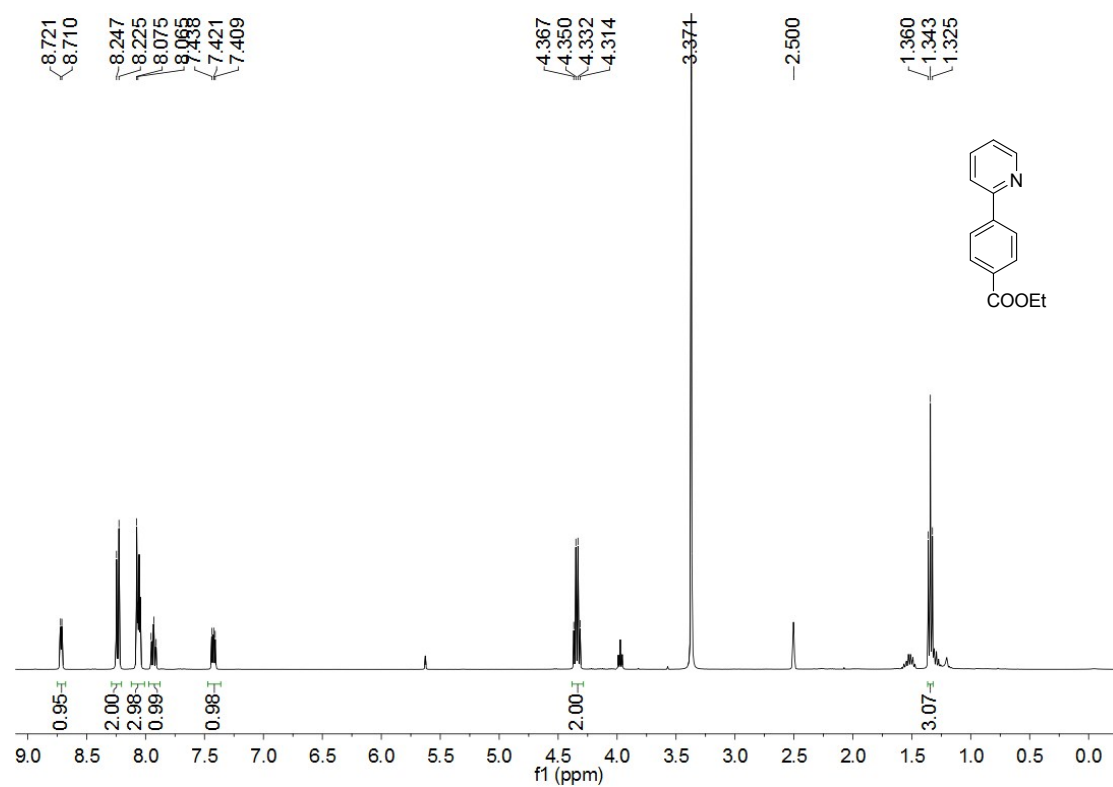

Fig. S10. The  $^1\text{H}$  NMR spectrum of **epbz1** in  $\text{DMSO-}d_6$ .

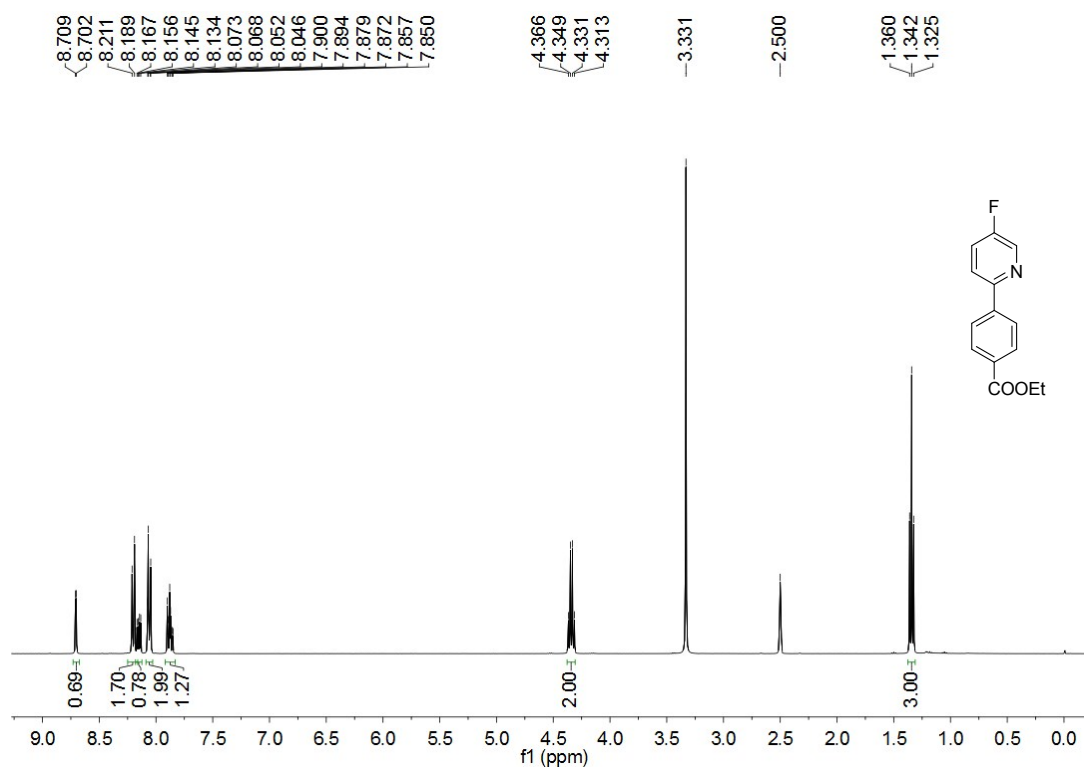

Fig. S11. The  $^1\text{H}$  NMR spectrum of **epbz2** in  $\text{DMSO-}d_6$ .

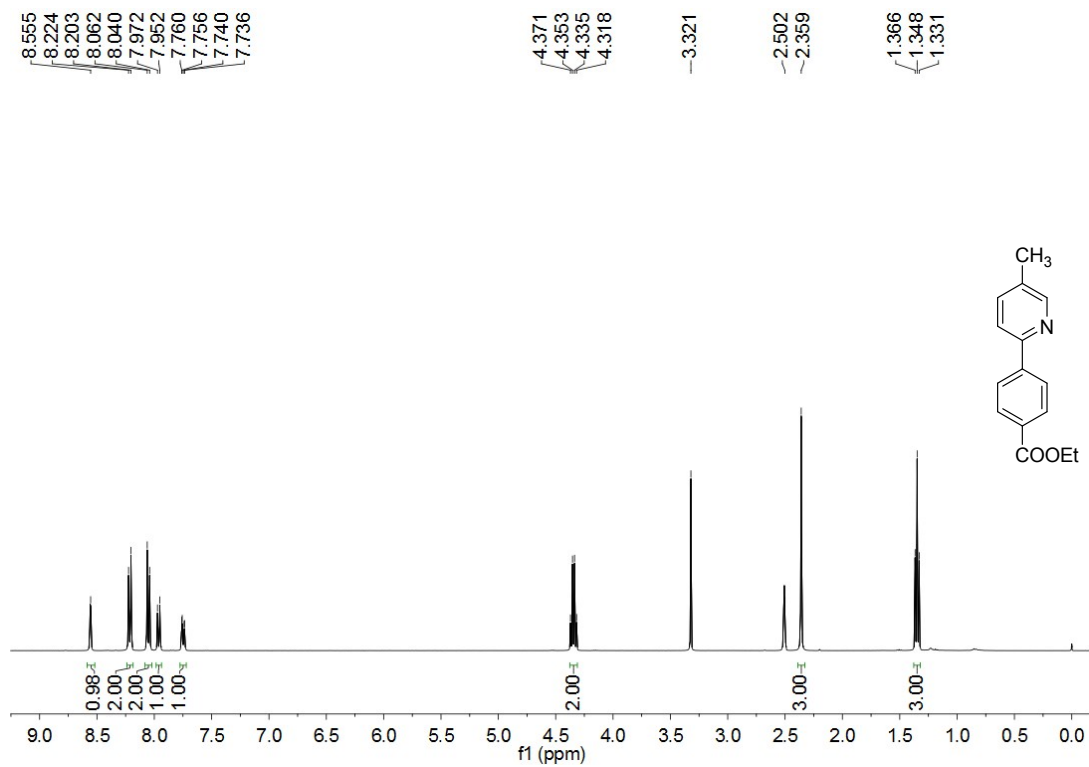

**Fig. S12.** The  $^1\text{H}$  NMR spectrum of **epbz3** in  $\text{DMSO-}d_6$ .

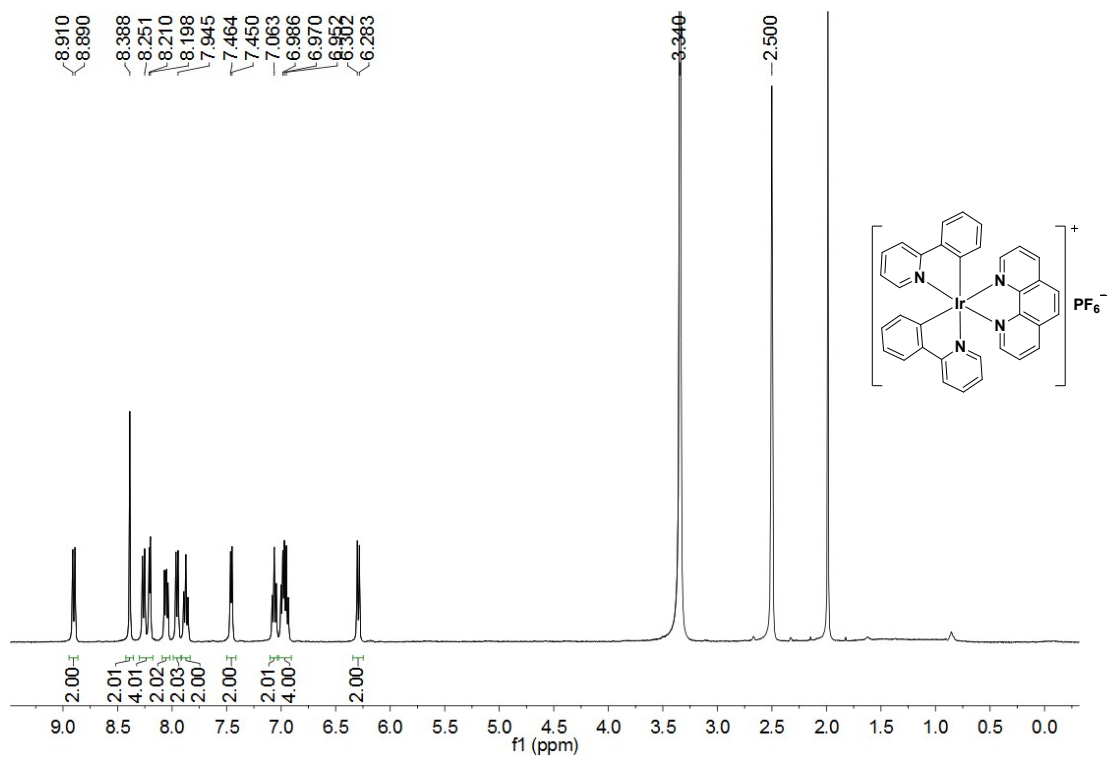

**Fig. S13.** The  $^1\text{H}$  NMR spectrum of **Ir0** in  $\text{DMSO-}d_6$ .

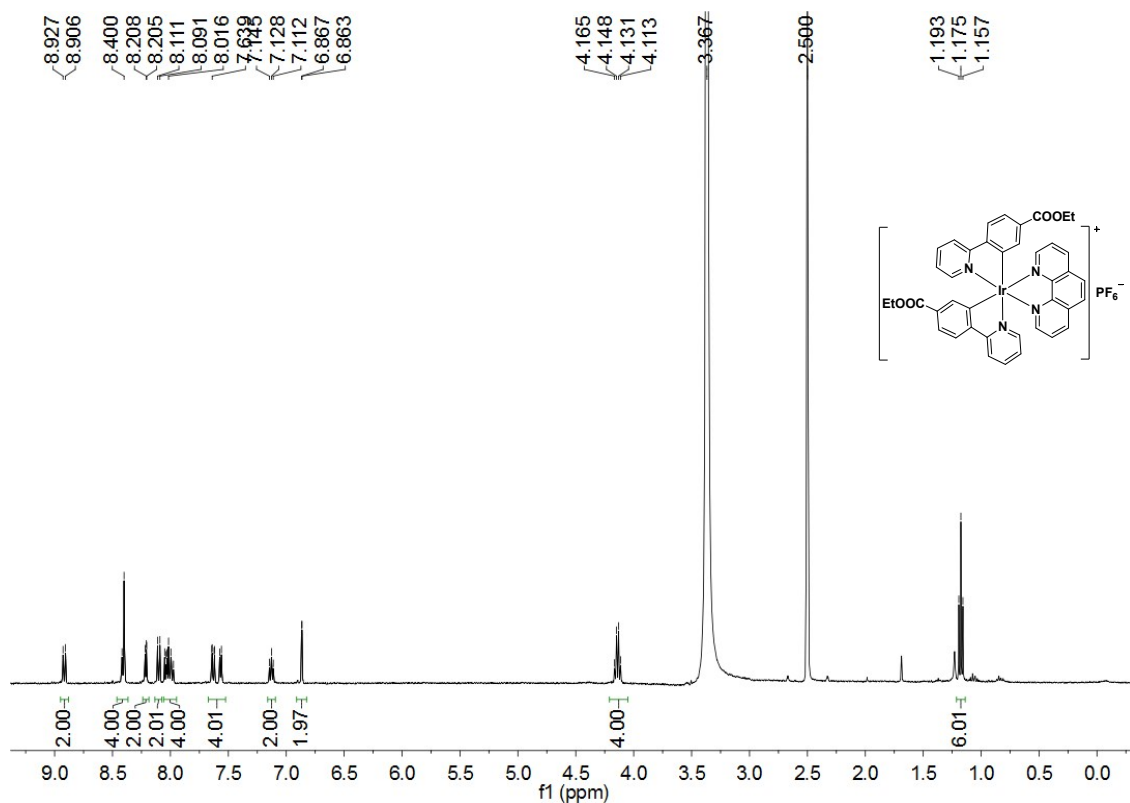

Fig. S14. The  $^1\text{H}$  NMR spectrum of **Ir1** in  $\text{DMSO-}d_6$ .

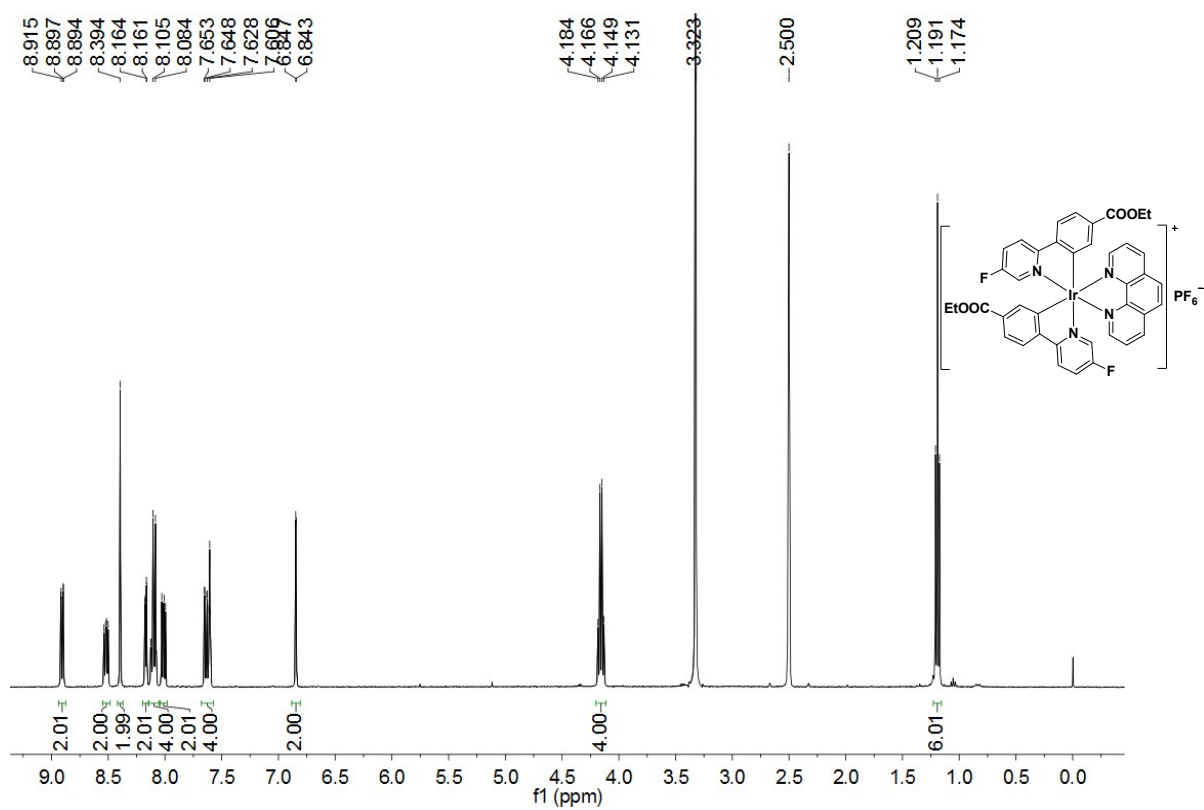

Fig. S15. The  $^1\text{H}$  NMR spectrum of **Ir2** in  $\text{DMSO-}d_6$ .

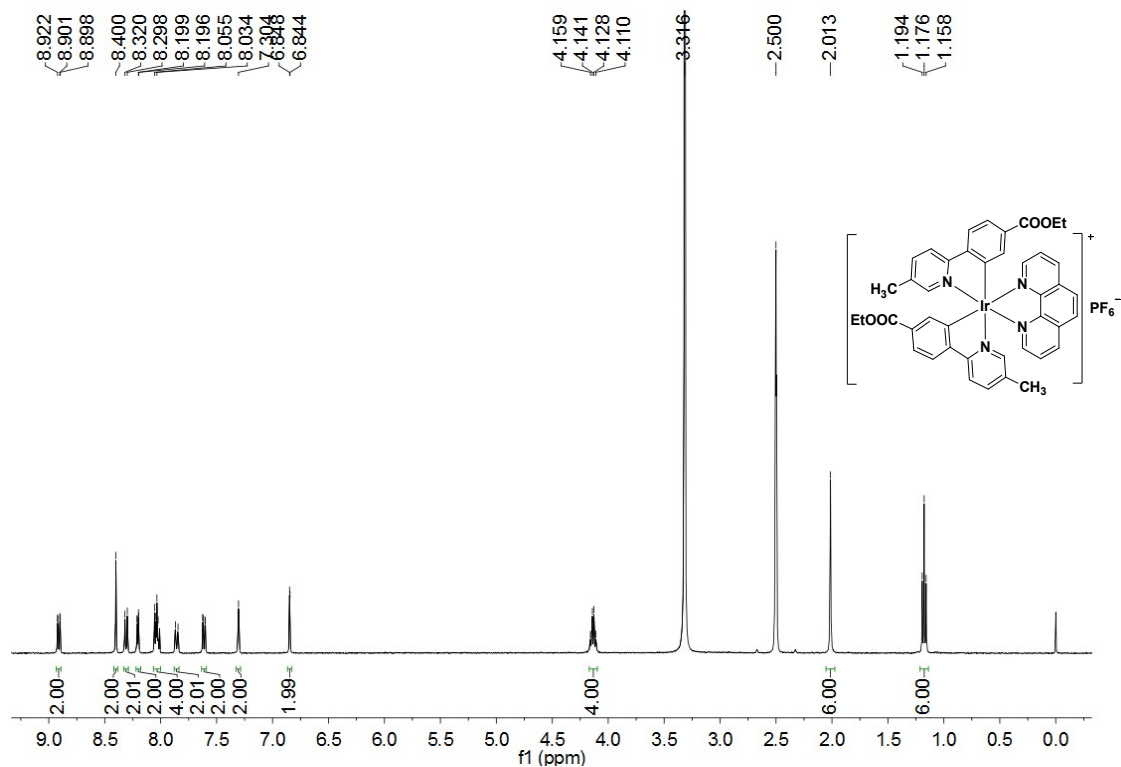

Fig. S16. The  $^1\text{H}$  NMR spectrum of Ir3 in  $\text{DMSO-}d_6$ .

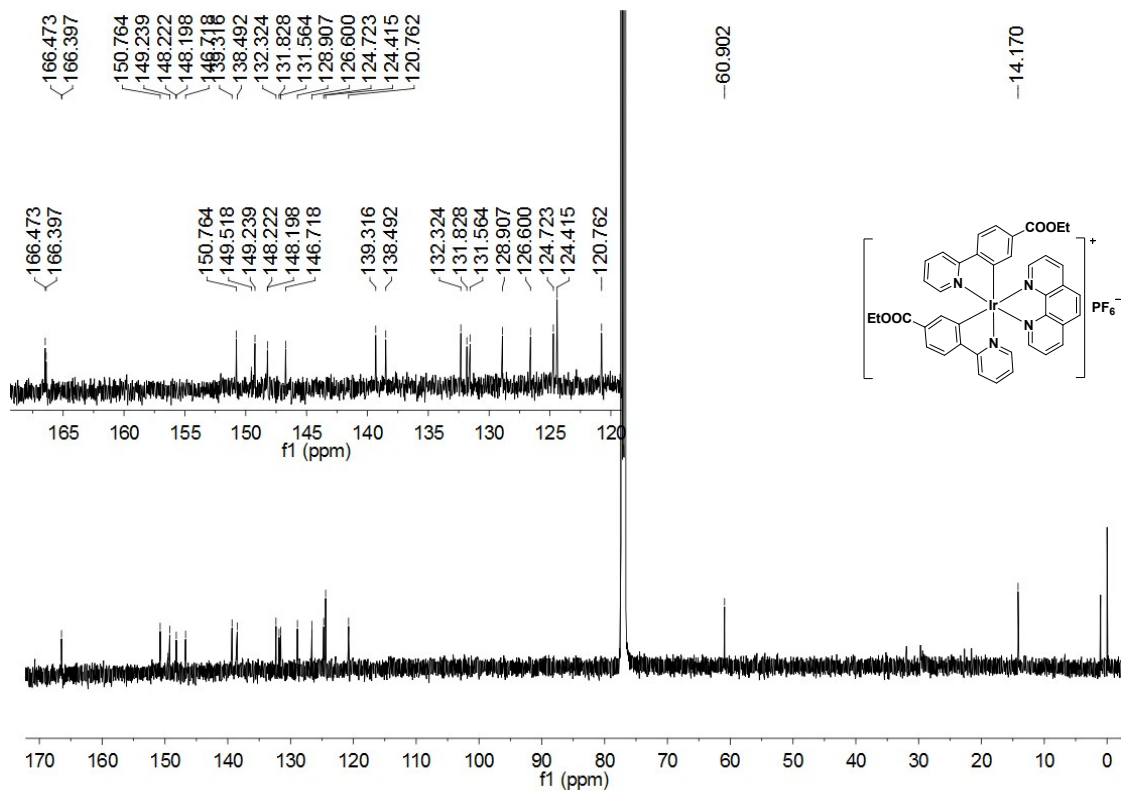

Fig. S17. The  $^{13}\text{C}$  NMR spectrum of Ir1 in  $\text{DMSO-}d_6$ .

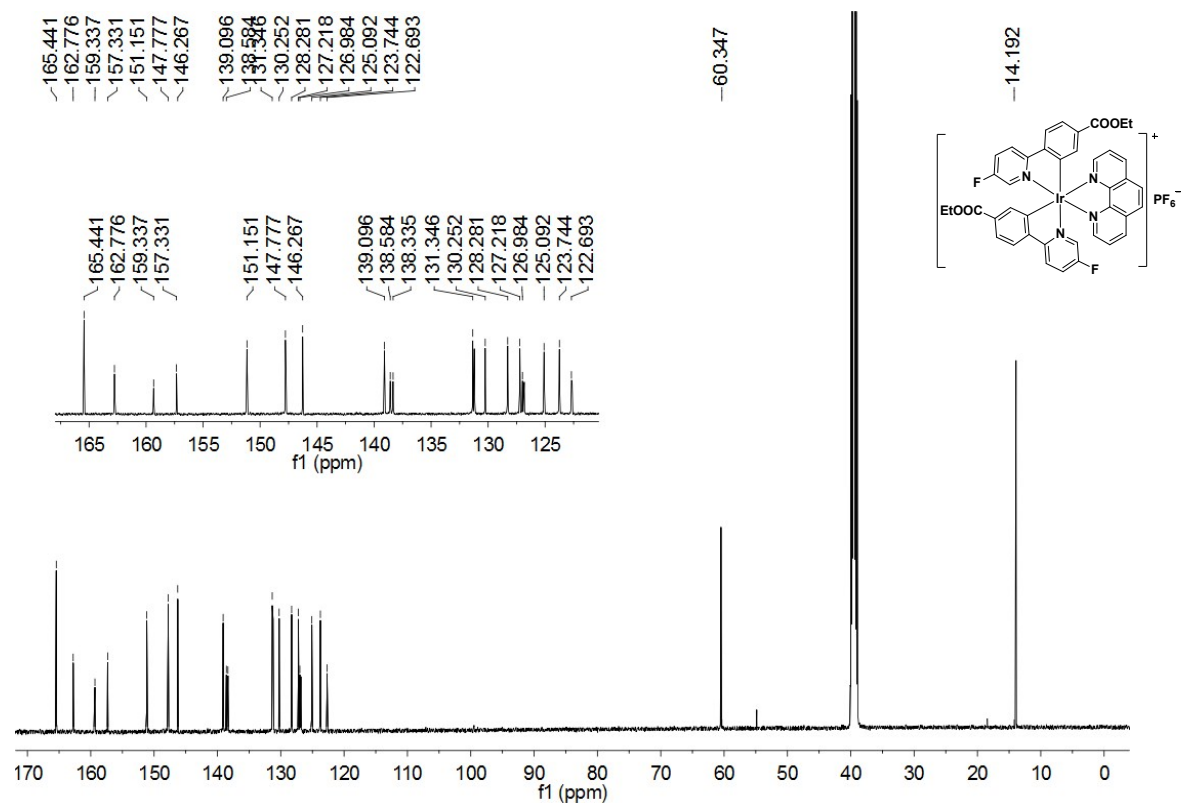

Fig. S18. The  $^{13}\text{C}$  NMR spectrum of Ir2 in  $\text{DMSO-}d_6$ .

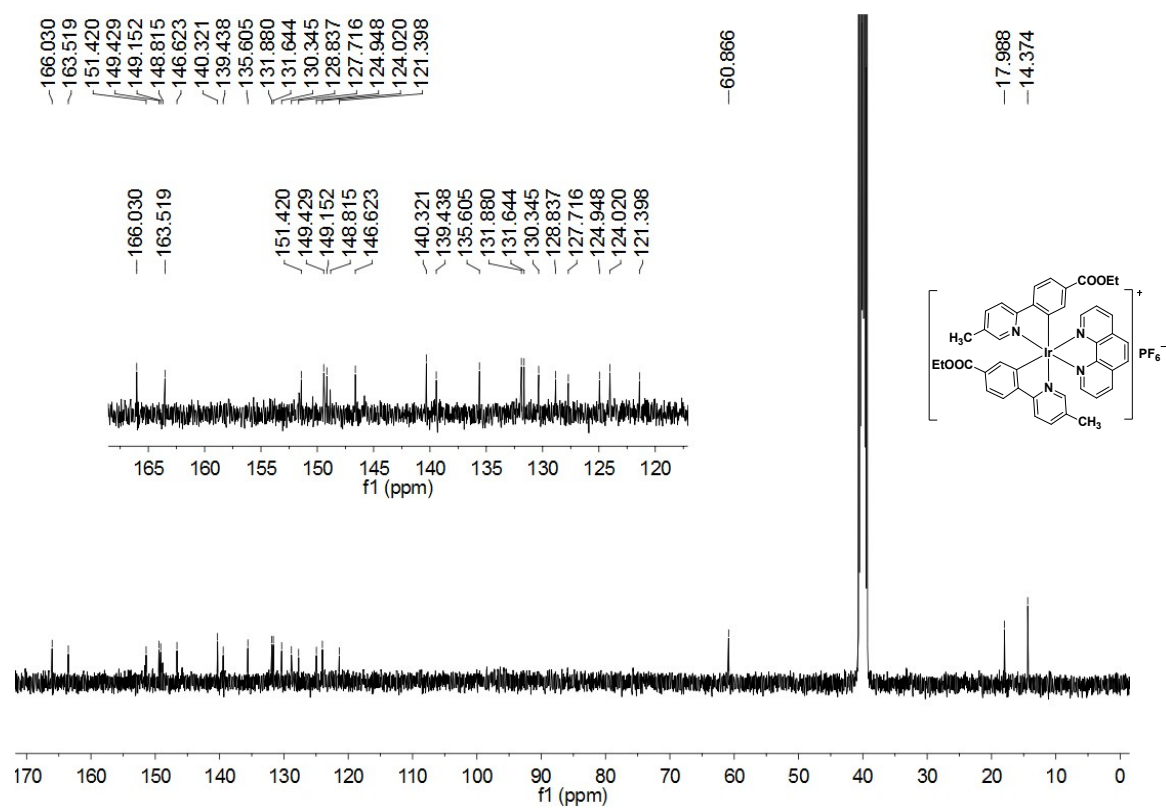

Fig. S19. The  $^{13}\text{C}$  NMR spectrum of Ir3 in  $\text{DMSO-}d_6$ .

YHC-1(CHCA)

14092505 30 (0.999)

TOF LD+  
4.87e3

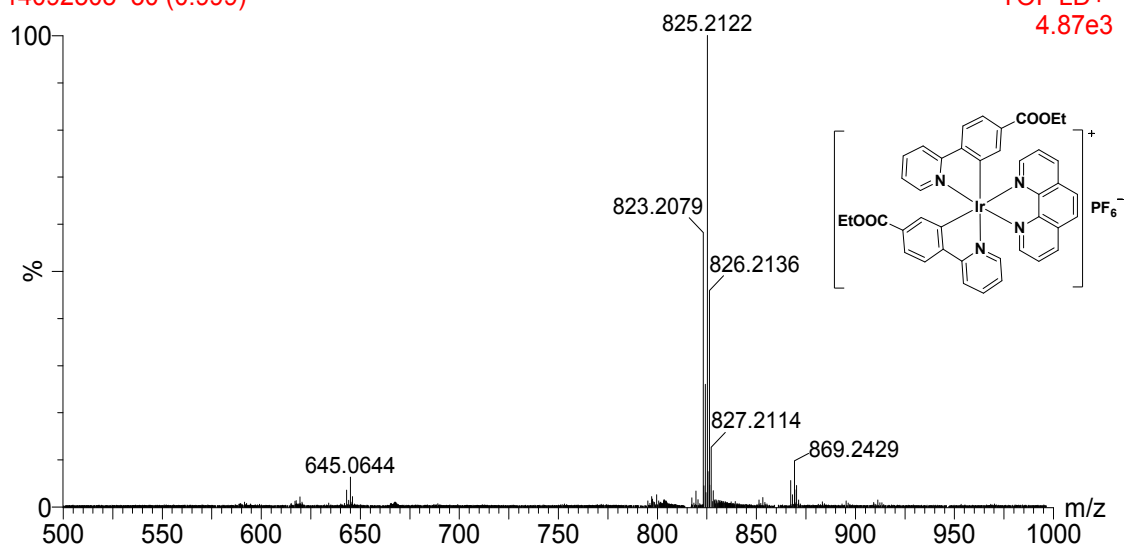

Fig. S20. The HRMS (EI) of Ir1.

YHC-2(CHCA)

14092506 41 (1.368)

TOF LD+  
1.57e4

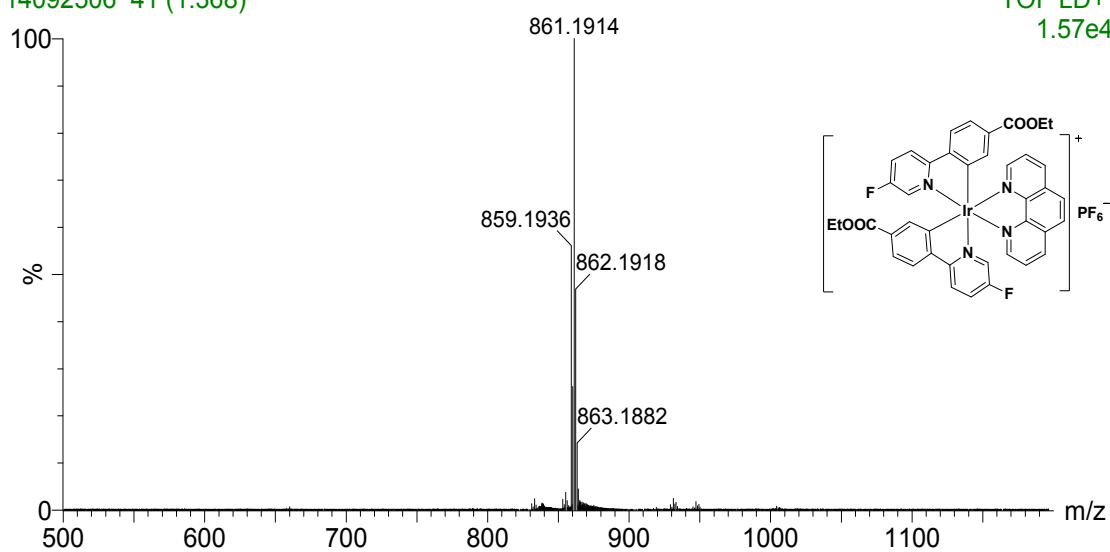

Fig. S21. The HRMS (EI) of Ir2.

YHC-3(CHCA)

14092507 11 (0.364)

TOF LD+  
9.72e3

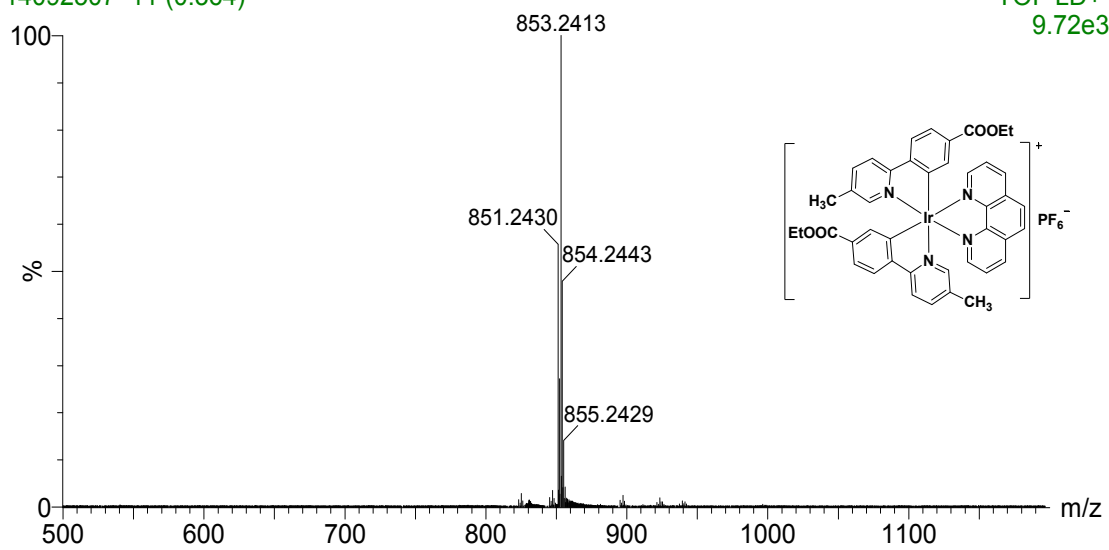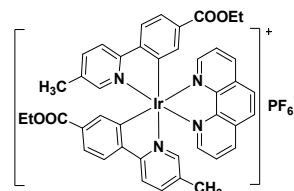

Fig. S22. The HRMS (EI) of Ir3.



## References

- [1] N. M. Shavaleev, F. Monti, R. D. Costa, R. Scopelliti, H. J. Bolink, E. Orti, G. Accorsi, N. Armaroli, E. Baranoff, M. Grätzel and M. K. Nazeeruddin, *Inorg. Chem.*, 2012, **51**, 2263-2271.
